# Supplementary material for: Modulation of fibronectin and laminin expression by Rhodium (II) citrate-coated maghemite nanoparticles in mice bearing breast tumor
Source: PubMed Central journal article supplement (PMC5738373; doi:10.1038/s41598-017-18204-1), 2017-12-20
Supplement: 41598_2017_18204_MOESM1_ESM.pdf [file 41598_2017_18204_MOESM1_ESM.pdf]

Modulation of fibronectin and laminin expression by Rhodium  
(II) citrate-coated maghemite nanoparticles in mice bearing  
breast tumor

Márcia Rocha<sup>a</sup>, Rachel Arcanjo<sup>b</sup>, Cláudio Lopes<sup>b</sup>, Marcella Carneiro<sup>b</sup>,  
Aparecido Souza<sup>c</sup> and Sônia Bão<sup>b,\*</sup>

## Supplementary information

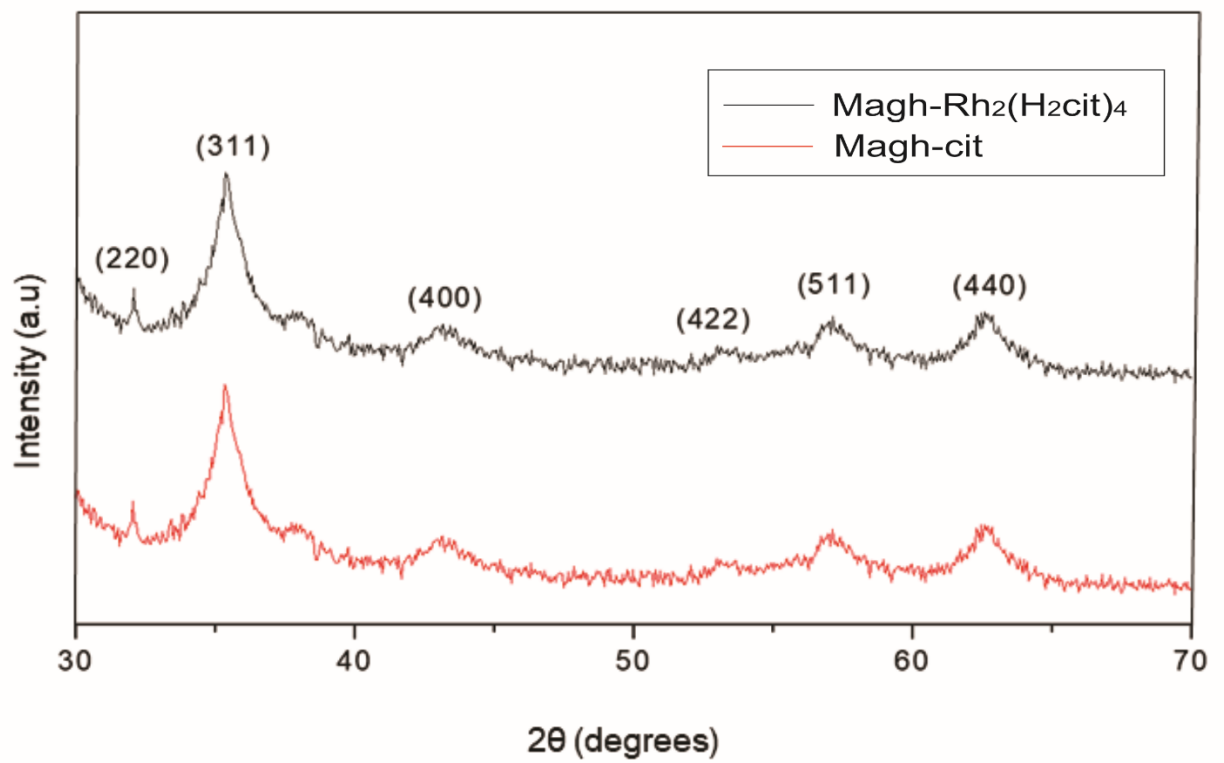

Figure S1: X-ray diffraction (XRD) diffractogram patterns of  $\text{Magh-cit}$  and  $\text{Magh-Rh}_2(\text{H}_2\text{cit})_4$ .

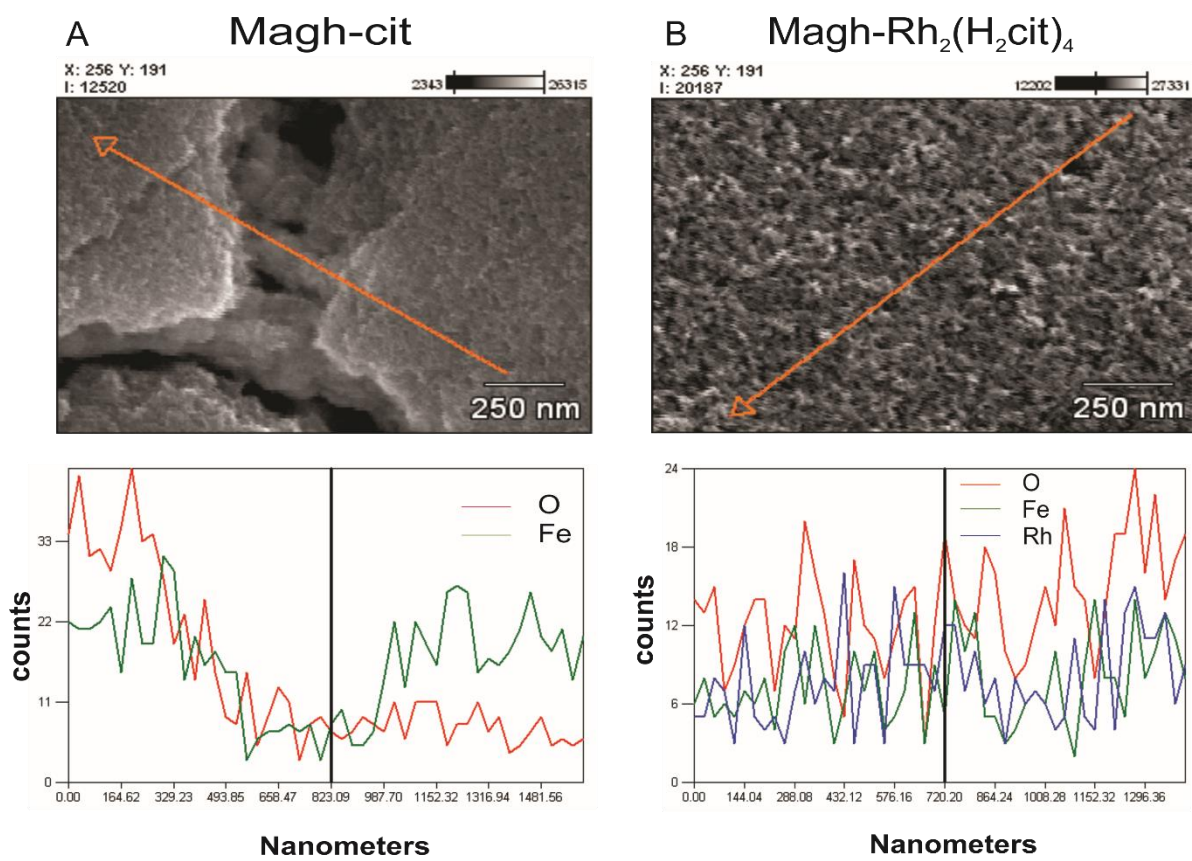

Figure S2: Energy dispersive spectra (EDS) of Magh-cit (A) and Magh-Rh<sub>2</sub>(H<sub>2</sub>cit)<sub>4</sub> (B) nanoparticles.

Supplementary table 1: Biochemical and hematology parameters of female Balb/c mice bearing breast carcinoma treated intratumorally with Rh<sub>2</sub>(H<sub>2</sub>cit)<sub>4</sub>, Magh-Rh<sub>2</sub>(H<sub>2</sub>cit)<sub>4</sub> and Magh-Cit.

| Parameters                    | Health     | Control      | Rh <sub>2</sub> (H <sub>2</sub> cit) <sub>4</sub> | Magh-Rh <sub>2</sub> (H <sub>2</sub> cit) <sub>4</sub> | Magh-Cit   |
|-------------------------------|------------|--------------|---------------------------------------------------|--------------------------------------------------------|------------|
| <i>Biochemical parameters</i> |            |              |                                                   |                                                        |            |
| <b>Creatinine (mg/dL)</b>     | 0.2 ± 0.1  | 0.3 ± 0.0    | 0.3 ± 0.1                                         | 0.2 ± 0.0                                              | 0.2 ± 0.0  |
| <b>ALT (U/L)</b>              | 38.3± 1.5  | 39 ± 1.0     | 38.2 ± 1.2                                        | 37.4 ± 2.6                                             | 37.6 ± 2.5 |
| <i>Hematology parameters</i>  |            |              |                                                   |                                                        |            |
| <b>HGB (g/dL)</b>             | 14.0 ± 0.4 | 12.8 ± 0.5   | 10.7 ± 2.3                                        | 12.7±1.0                                               | 13.4 ± 0.2 |
| <b>HCT (%)</b>                | 42.9 ± 0.3 | 39.6 ± 0.2   | 42.1 ± 0.3                                        | 41.0 ± 0.2                                             | 42.3± 0.4  |
| <b>MCHC (g/mL)</b>            | 32.6 ± 0.4 | 32.3 ± 0.3   | 30.1 ± 1.5                                        | 31.0 ± 1.4                                             | 31.7± 0.2  |
| <b>MCH (pg)</b>               | 15.7 ± 0.2 | 15.3 ± 0.1   | 14.5 ± 0.7                                        | 15.1± 0.7                                              | 15.5 ± 0.3 |
| <b>MCV (fL)</b>               | 48.3 ± 0.2 | 47.3 ± 0.3   | 48.2 ±0.3                                         | 48.9 ± 0.4                                             | 48.8± 0.7  |
| <b>WBC (/mm<sup>3</sup>)</b>  | 3816±4057  | 2040±3958    | 3352±1009                                         | 3654±1810                                              | 3866±3958  |
| <b>Lymphocytes (%)</b>        | 40.2 ± 2.1 | 44.8 ± 3.1   | 41.2 ± 2.3                                        | 43.0 ± 3.3                                             | 46.0 ± 2.2 |
| <b>Eosinophils (%)</b>        | 5.6 ± 1.2  | 5.4 ± 0.9    | 5.2 ± 0.7                                         | 4.0 ± 0.40                                             | 4.9 ± 0.32 |
| <b>Monocytes (%)</b>          | 48.3 ± 4.6 | 46.9 ± 4.2.0 | 47.7 ± 2.0                                        | 47 ± 2.8                                               | 3.3 ± 6.9  |

*Legend: ALT- Alanine Transaminase; RBC - Red Blood Cells; HGB - Hemoglobin; HCT Hematocrit; MCHC - Mean Corpuscular Hemoglobin Concentration; MCH - Mean Corpuscular Hemoglobin; MCV- Mean Corpuscular Volume; WBC - White Blood Cells; Data correspond as mean ± standard error.*
